# Supplementary material for: Analysis of T and B Cell Epitopes to Predict the Risk of de novo Donor-Specific Antibody (DSA) Production After Kidney Transplantation: A Two-Center Retrospective Cohort Study
Source: PubMed Central journal article supplement (PMC7481442; doi:10.3389/fimmu.2020.02000), 2020-08-27
Supplement: Image_4.pdf [file Image_4.pdf]

(C)

PIRCHE score

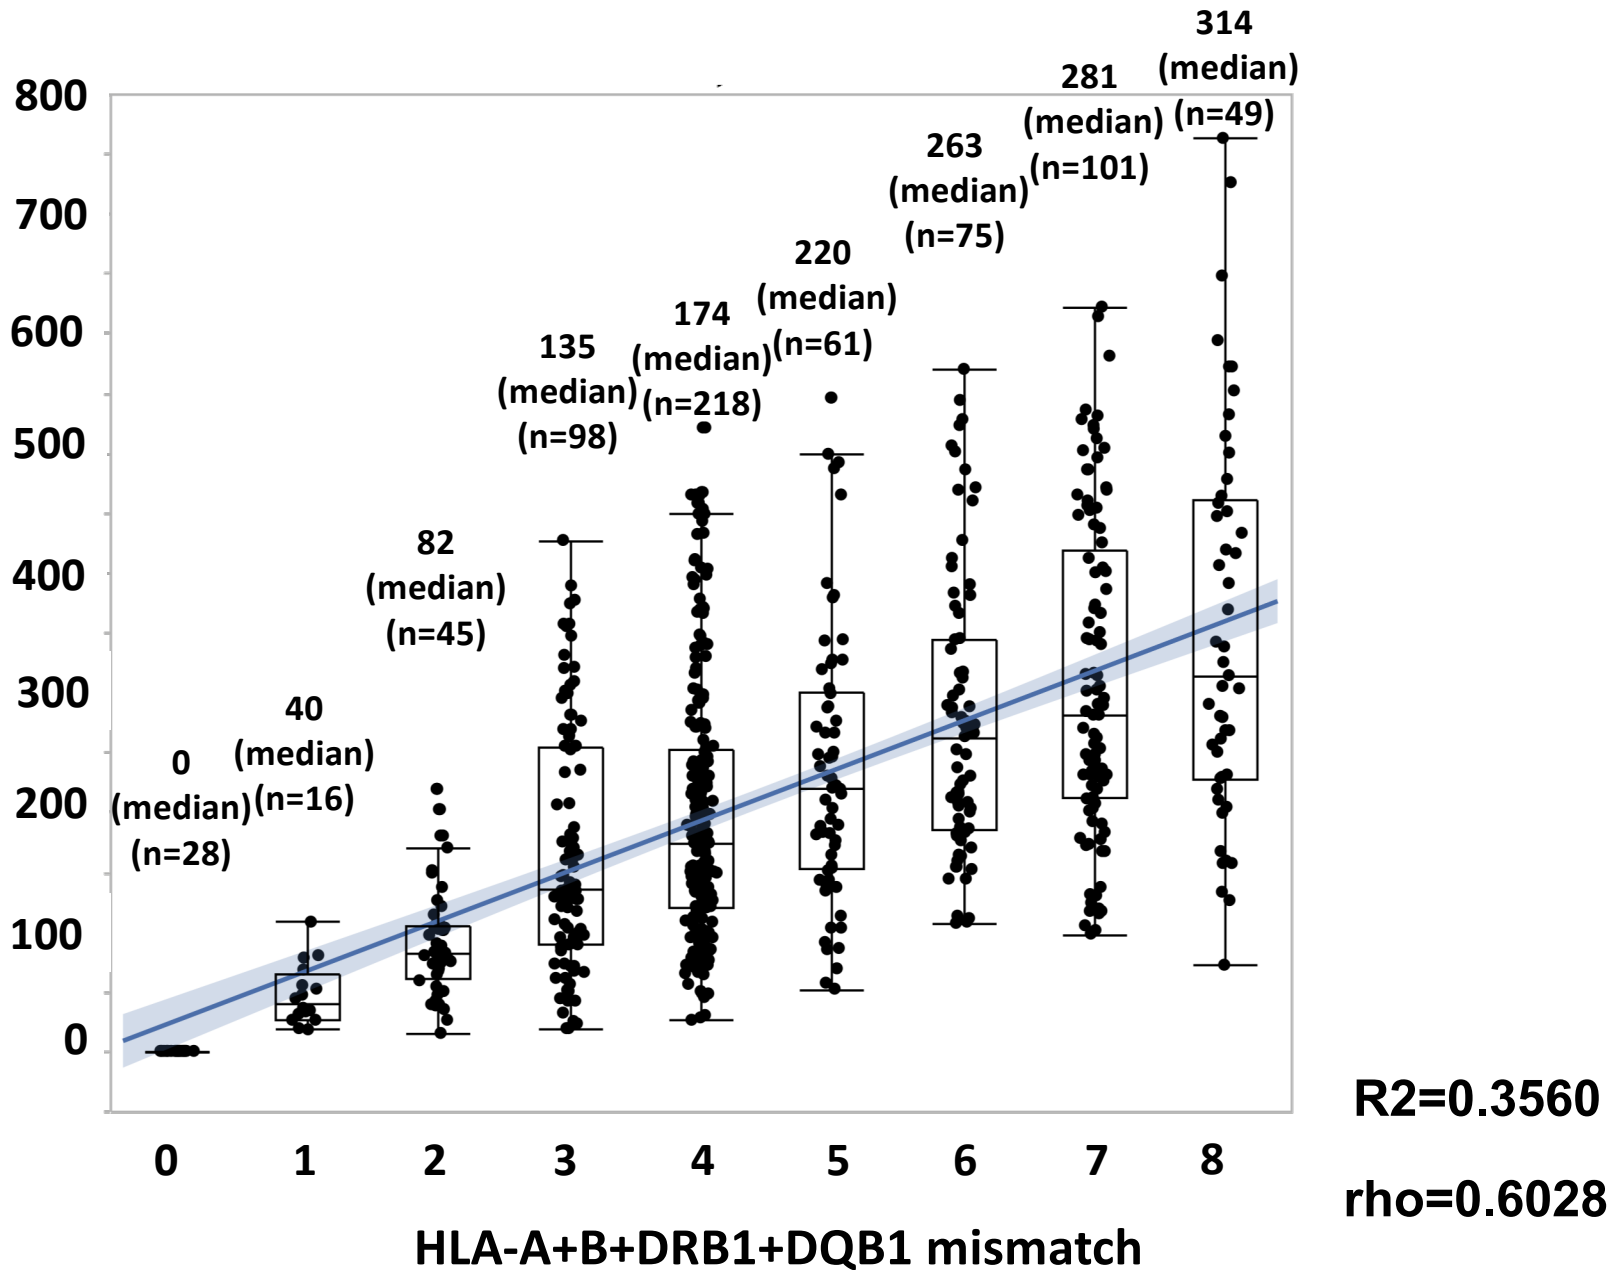

Supplementary Figure 2C. Association between classical HLA-A, B, DRB1, DQB1 mismatch and PIRCHE score

Box plots show minimum, first quartile, median, third quartile and maximum. Outliers are also displayed.
