# Supplementary material for: Analysis of T and B Cell Epitopes to Predict the Risk of de novo Donor-Specific Antibody (DSA) Production After Kidney Transplantation: A Two-Center Retrospective Cohort Study
Source: PubMed Central journal article supplement (PMC7481442; doi:10.3389/fimmu.2020.02000), 2020-08-27
Supplement: Image_5.pdf [file Image_5.pdf]

**(A) Eplet mismatches**

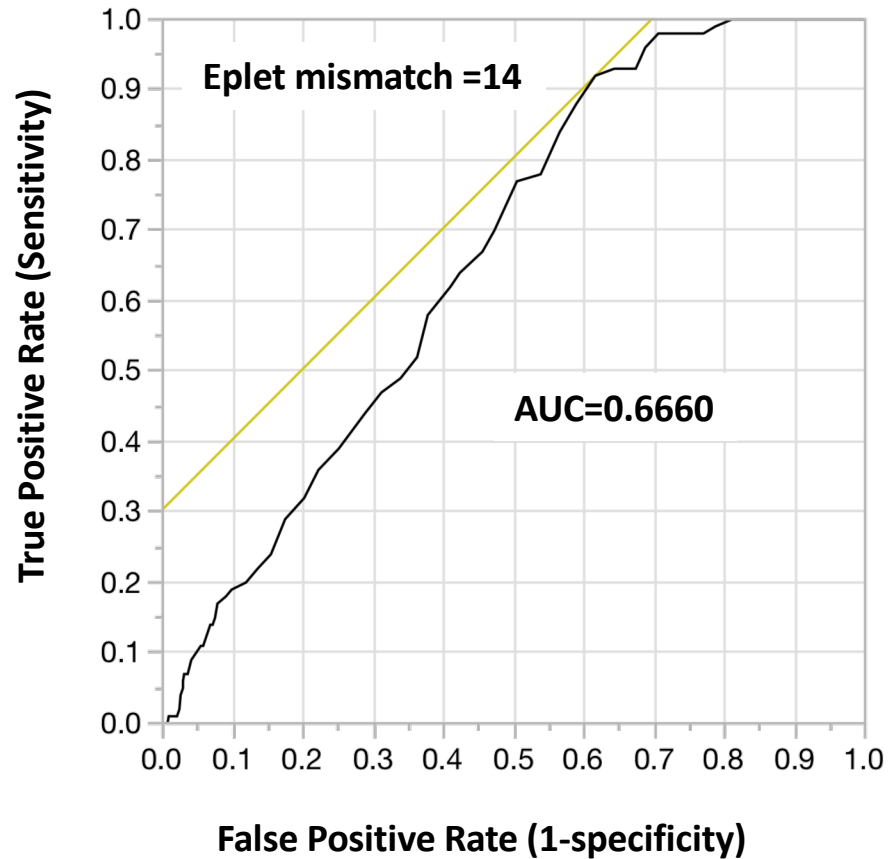

**(B) PIRCHE scores**

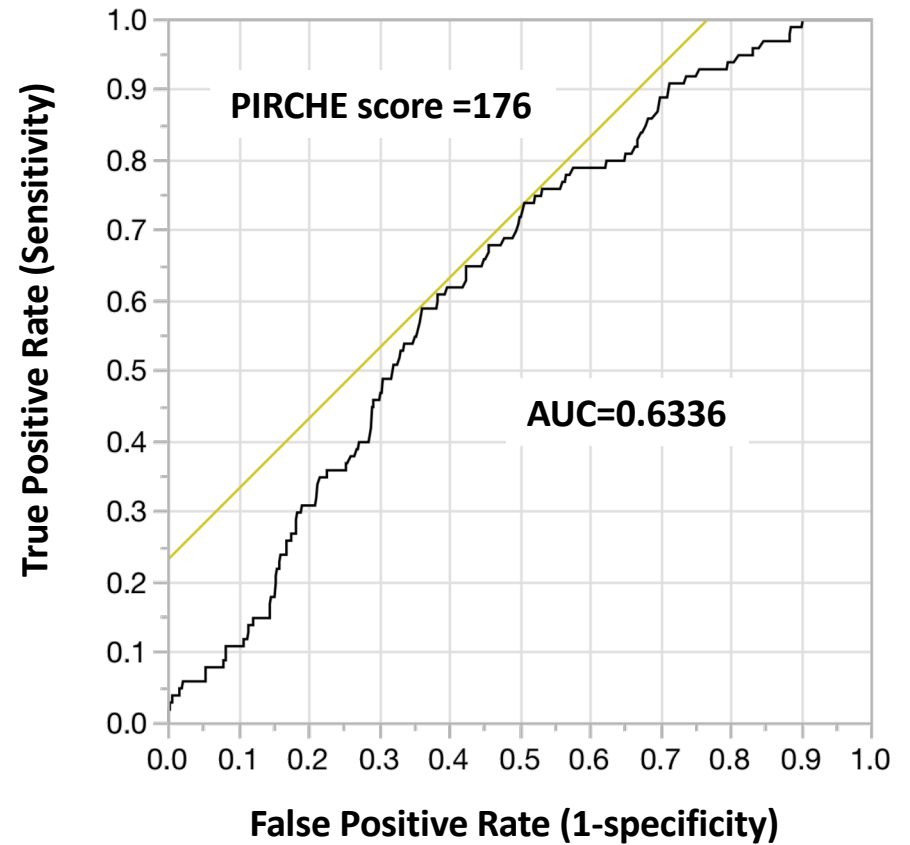

**Supplementary Figure 3. ROC curves for prediction of de novo DSA production**

ROC (receiver operating characteristic) curve and AUC (area under the curve) are by (A) eplet mismatches and (B) PIRCHE scores.
